# Supplementary material for: Identification of senescence rejuvenation mechanism of Magnolia officinalis extract including honokiol as a core ingredient
Source: publisher site journal article supplement (doi:10.18632/aging.206207), 2025-02-21
Supplement: Supplementary file [file aging-v17-206207-supplementary-material-SD1.pdf]

## SUPPLEMENTARY FIGURE

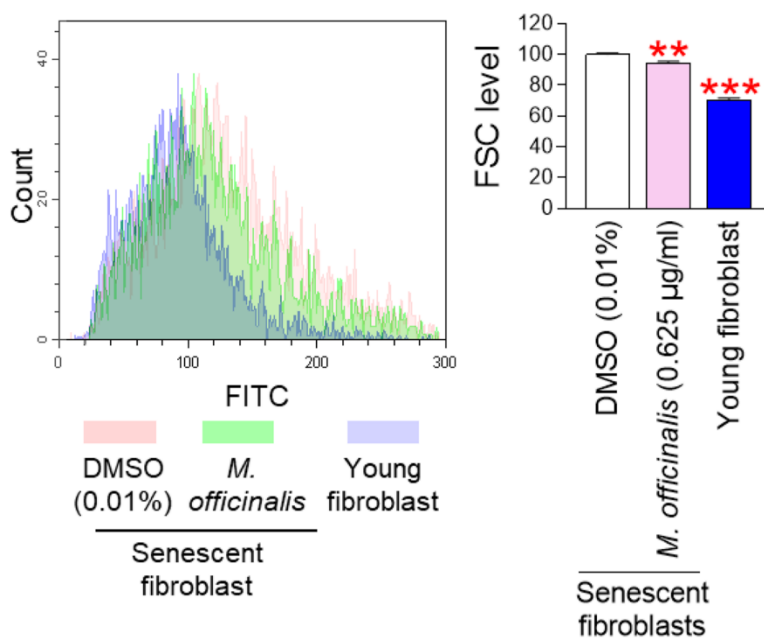

**Supplementary Figure 1. Flow cytometry analysis of forward scatter (FSC).** After 12 days of treatment with DMSO (0.01%) or honokiol (1 µM), FSC level was by flow cytometry. The representative histogram of FSC was shown. \*\* $P < 0.01$ , \*\*\* $P < 0.001$ , Student t-test. Mean  $\pm$  S.D., N = 3.
